# Supplementary material for: Pore-scale salt precipitation and transport in fractures during carbon dioxide storage: roles of fracture geometry, brine chemistry, and phase state
Source: Royal Society of Chemistry journal article supplement (doi:10.1039/d5lc00843c), 2025-12-11
Supplement: d5lc00843c1.pdf [file d5lc00843c1.pdf]

## Supplementary Information

### **Pore-Scale Salt Precipitation and Transport in Fractures during Carbon Dioxide Storage: Roles of Fracture Geometry, Brine Chemistry, and Phase State**

Shanchao Liu<sup>a</sup>, Zengding Wang<sup>a</sup>, Kaiyue Ding<sup>a</sup>, Yulin Zhang<sup>a</sup>, Chuang Ning<sup>a</sup>, Cunqi Jia<sup>b</sup>, Mingshan Zhang<sup>c</sup>, Jun Yao<sup>a</sup>, Hai Sun<sup>a</sup>, Yongfei Yang<sup>a</sup>, Lei Zhang<sup>a</sup>, Junjie Zhong<sup>a\*</sup>

*<sup>a</sup> State Key Laboratory of Deep Oil and Gas, China university of Petroleum (East China), Qingdao 266580, P.R. China*

*<sup>b</sup> Hildebrand Department of Petroleum and Geosystems Engineering, The University of Texas at Austin, Austin, Texas, USA*

*<sup>c</sup> School of Vehicle and Energy, Yanshan University, Qinhuangdao, China, 066000*

\*Corresponding authors. Email address: [zhongjunjie@upc.edu.cn](mailto:zhongjunjie@upc.edu.cn) (J.Z.)

## **List of captions**

|                                                                                                    |    |
|----------------------------------------------------------------------------------------------------|----|
| Section 1: Microfluidic Chip Design and Configuration .....                                        | 3  |
| Section 2: Experimental Cases and Procedures .....                                                 | 5  |
| Section 3: Salt Coverage Distribution in Unfractured Model.....                                    | 10 |
| Section 4: Salt Migration Traces at the Outlet in Unfractured and Discrete Fracture<br>Model ..... | 11 |
| Section 5: Salt Coverage Evolution in Discrete Fracture Model .....                                | 14 |
| Section 6: Brine Film Formation within Fractures in Interconnected Fracture Model                  | 15 |
| References .....                                                                                   | 17 |

## Section 1: Microfluidic Chip Design and Configuration

Three microfluidic models—unfractured, discrete fracture, and interconnected fracture—were designed based on the geological parameters in Table S1 (Fig. S1a). Model geometries are summarized in Table S2.

**Table S1.** Geological parameters from representative geological carbon storage (GCS) projects

| Project                                   | Lithology                     | Region                   | Porosity | Pore Size Range      |
|-------------------------------------------|-------------------------------|--------------------------|----------|----------------------|
| Sleipner (North Sea, Norway) <sup>1</sup> | Utsira                        | Reservoir                | 30-35%   | 10–100 $\mu\text{m}$ |
|                                           | Nordland Shale                | Caprock                  | <10%     | <1 $\mu\text{m}$     |
|                                           | Dogger Limestone <sup>2</sup> | Reservoir                | 14.5%    | 1–10 $\mu\text{m}$   |
| Paris Basin (France)                      | Callovo-Oxfordian             | Caprock                  | 6%       | 5–100 nm             |
|                                           | Shale <sup>3</sup>            |                          |          |                      |
| Jiangnan Basin (China) <sup>4</sup>       | Xingouzui Sandstone           | Reservoir                | 17%      | 10–100 $\mu\text{m}$ |
|                                           | Mudstone                      | Caprock                  | 7.5%     | <1 $\mu\text{m}$     |
| Generic Shale reservoir                   | Shale                         | Matrix <sup>5</sup>      | 3.0–4.8% | Nanopores            |
|                                           |                               | Fractures <sup>6,7</sup> | 1–10%    | /                    |

**Table S2.** Design parameters of microfluidic chip models used in this study

| Fracture structure | Reservoir region porosity (%) | Caprock region porosity (%) | Fracture region porosity (%) |
|--------------------|-------------------------------|-----------------------------|------------------------------|
| Unfractured model  | 14.86                         | 1.71                        | /                            |

|                               |       |      |       |
|-------------------------------|-------|------|-------|
| Discrete fracture model       | 14.86 | 1.71 | 3.26  |
| Interconnected fracture model | 13.80 | 1.71 | 10.89 |

The microfluidic chips used in experiments consist of three functional domains: the reservoir region, the caprock region, and the fracture region. The reservoir region is composed of randomly packed circular obstacles with diameters of 80, 150, and 500  $\mu\text{m}$ , forming a heterogeneous pore structure with channel widths of 10, 40, 60, 100, and 150  $\mu\text{m}$ . This region is etched to a depth of 10  $\mu\text{m}$  (Fig. S1b). The caprock region features a regular array of square cells (1000  $\mu\text{m}$  side length) connected by 10  $\mu\text{m}$ -wide channels, with a total etching depth of 1  $\mu\text{m}$  (Fig. S1c). The fracture region comprises open channels with widths of 40, 60, 100, and 150  $\mu\text{m}$ , etched to a depth of 40  $\mu\text{m}$  to simulate conductive fracture pathways (Fig. S1d).

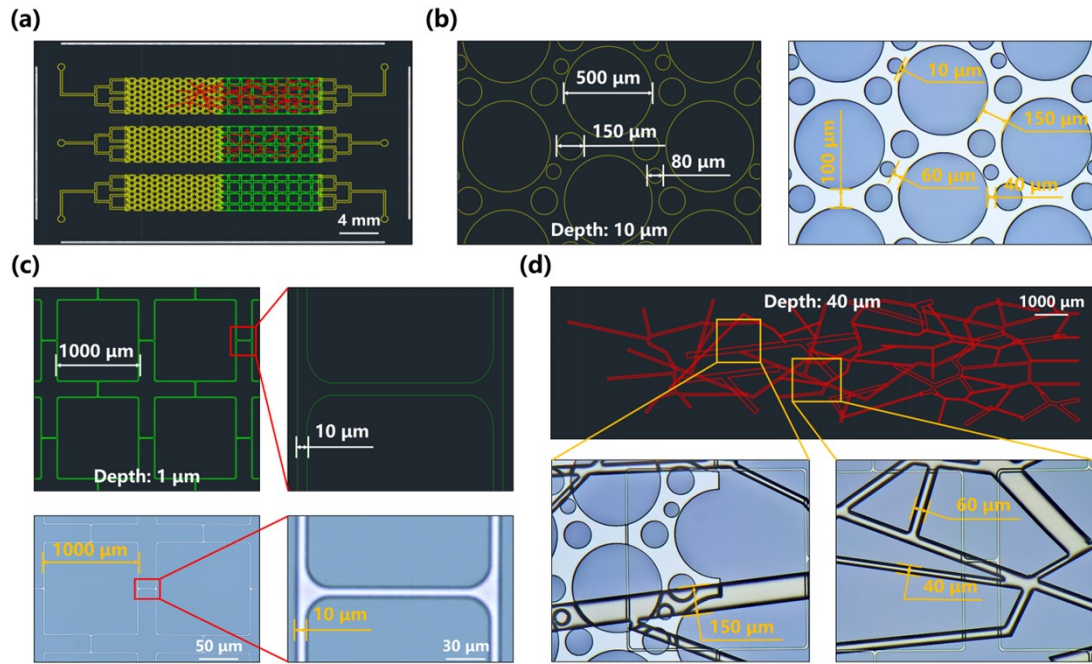

**Fig. S1.** Design and visualization of microfluidic chip models: (a) full chip layout; (b) reservoir region; (c) caprock region; (d) fracture region.

## Section 2: Experimental Cases and Procedures

Table S3 summarizes 18 experimental cases. Microfluidic experiments investigated the effects of fracture geometry, CO<sub>2</sub> phase, and brine composition on salt precipitation, aggregation, and migration. The chip included unfractured, discrete fracture, and interconnected fracture models to simulate caprock–reservoir fracture conditions. Displacement conditions included gas-phase CO<sub>2</sub> (5.5 MPa, 60 °C) and supercritical CO<sub>2</sub> (8.5 MPa, 60 °C). Brine compositions consisted of 20 wt% NaCl, 20 wt% CaCl<sub>2</sub>, and a mixed solution with 10 wt% of each salt.

**Table S3.** Details of Experimental Cases.

| Case | Fracture structure            | CO <sub>2</sub> phase | Brine composition                  |
|------|-------------------------------|-----------------------|------------------------------------|
| 1    | Unfractured model             | Gas                   | 20wt% NaCl                         |
| 2    |                               |                       | 20wt% CaCl <sub>2</sub>            |
| 3    |                               |                       | 10wt% NaCl+10wt% CaCl <sub>2</sub> |
| 4    |                               | Supercritical         | 20wt% NaCl                         |
| 5    |                               |                       | 20wt% CaCl <sub>2</sub>            |
| 6    |                               |                       | 10wt% NaCl+10wt% CaCl <sub>2</sub> |
| 7    | Discrete fracture model       | Gas                   | 20wt% NaCl                         |
| 8    |                               |                       | 20wt% CaCl <sub>2</sub>            |
| 9    |                               |                       | 10wt% NaCl+10wt% CaCl <sub>2</sub> |
| 10   |                               | Supercritical         | 20wt% NaCl                         |
| 11   |                               |                       | 20wt% CaCl <sub>2</sub>            |
| 12   |                               |                       | 10wt% NaCl+10wt% CaCl <sub>2</sub> |
| 13   | Interconnected fracture model | Gas                   | 20wt% NaCl                         |
| 14   |                               |                       | 20wt% CaCl <sub>2</sub>            |
| 15   |                               |                       | 10wt% NaCl+10wt% CaCl <sub>2</sub> |

|    |               |                                    |
|----|---------------|------------------------------------|
| 16 |               | 20wt% NaCl                         |
| 17 | Supercritical | 20wt% CaCl <sub>2</sub>            |
| 18 |               | 10wt% NaCl+10wt% CaCl <sub>2</sub> |

The experimental setup was designed to observe salt precipitation and migration during CO<sub>2</sub> leakage (Fig. 1b). The setup includes a chip manifold, injection system, temperature control unit, monitoring system, imaging system, and vacuum line. The chip manifold is made of C-276 Hastelloy, which resists corrosion and operates at up to 100 °C and 30 MPa. The injection system consists of a 60 MPa pressure-rated reservoir and a high-precision pump (XHC-D, 0.01 MPa resolution). A thermostatic water bath circulates deionized water to maintain the temperature. Temperature and pressure are monitored with a multi-channel thermometer (UNI-T UT3208) and a precision pressure sensor (OMEGA PX409). Five thermocouple ports are evenly distributed within the chip holder for accurate temperature feedback. The imaging system uses an Axio Scope.A1 microscope with 4× and 10× objectives and a CMOS camera (5440 × 3648 pixels, 15 Hz).

A novel experimental method was developed to dynamically visualize salt precipitation process resulting from CO<sub>2</sub>-brine interactions under pore-scale conditions. This method enables precise simulation of reservoir pressure and temperature, facilitating in-situ observation of the nucleation, growth, and migration of salt crystals during CO<sub>2</sub> injection. By combining microfluidic control, real-time imaging, and quantitative data analysis, the system captures the temporal evolution of

salt morphology and its effects on pore structure, permeability, and fracture sealing under different chip geometries and CO<sub>2</sub> phase states.

Experimental procedures and parameters.

**Step 1:** Assemble microfluidic apparatus. A clean microfluidic chip is installed into the manifold, and nitrile O-rings are used to seal inlet and outlet ports to prevent leakage.

**Step 2:** Calibrate the optical imaging system. The microscope is adjusted to ensure accurate and sharp focus. Camera settings such as flat-field correction, contrast, brightness, and saturation are optimized to ensure image clarity and distinguishability across different flow channel regions.

**Step 3:** Introduce a small amount of CO<sub>2</sub> at atmospheric pressure to displace residual air in chip and tubing. Leak tightness is checked, and then vacuum pump is activated to evacuate system for 4 hours until internal pressure drops below 10 Pa.

**Step 4:** Activate thermostatic water bath and set temperature to 60 °C. After at least 30 minutes of heating, the internal temperature at multiple points in chip is verified via thermocouples inserted into manifold ports to ensure thermal equilibrium.

**Step 5:** Saturate chip with brine. The dual-cylinder pump at brine inlet is set to constant pressure mode at  $P_1 = 0.5$  MPa to drive at least 100 pore volumes brine from an intermediate reservoir and fully saturate microfluidic network.

**Step 6:** Pressurize chip to simulate subsurface conditions. The CO<sub>2</sub>-side dual-cylinder pump is also set to constant pressure mode at  $P_2 > P_1$ . The pressure differential

$(P_2 - P_1)$  is optimized to enable controlled advancement of CO<sub>2</sub>-brine interface. Once  $P_2$  reaches target pressure, both  $P_1$  and  $P_2$  are equilibrated to maintain stable system pressure. In our experiments, a pressure differential of 0.1 MPa was applied, which represents the minimum driving pressure required for stable displacement of CO<sub>2</sub>-brine interface in unfractured model.

**Step 7:** Record experimental data. During the initial two hours, full-chip images are acquired every 10 minutes. In the subsequent two hours, images are taken every 15 minutes. This imaging protocol captures the dynamic evolution of brine evaporation, salt nucleation, crystal aggregation, and transport within the chip.

Under storage-relevant conditions, representative dynamic viscosities are  $\mu_{\text{gas-phaseCO}_2} \approx 1\text{-}2 \times 10^{-5} \text{ Pa}\cdot\text{s}$ ,  $\mu_{\text{scCO}_2} \approx 2\text{-}4 \times 10^{-5} \text{ Pa}\cdot\text{s}$ , while CO<sub>2</sub> solubility in 1-3 wt% NaCl brines at 30-60 °C and 10-20 MPa is on the order of  $10^{-2}$  in mole fraction<sup>8,9</sup>. Under our conditions,  $\mu_{\text{scCO}_2}$  is only a few times larger than  $\mu_{\text{gas-phaseCO}_2}$  but ~20-50 times smaller than  $\mu_{\text{brine}}$ , so both CO<sub>2</sub> states remain much less viscous than brine<sup>8,10</sup>. This supports the interpretation that differences in salt coverage mainly arise from film connectivity and evaporation capacity rather than from large changes in average  $S_{\text{wr}}$ .

Table S4 presents the water saturation values for all cases after CO<sub>2</sub> breakthrough.

**Table S4.** Water Saturation in Different Chip Geometries.

| Case | Water saturation after CO <sub>2</sub> breakthrough (%) |              |               |
|------|---------------------------------------------------------|--------------|---------------|
|      | Reservoir zone                                          | Caprock zone | Fracture zone |
| 1    | 30.48                                                   | 0            | /             |
| 2    | 30.93                                                   | 0            | /             |



|    |       |       |       |
|----|-------|-------|-------|
| 3  | 28.74 | 0     | /     |
| 4  | 38.52 | 0     | /     |
| 5  | 40.03 | 0     | /     |
| 6  | 37.39 | 0.67  | /     |
| 7  | 31.04 | 33.96 | 3.31  |
| 8  | 32.03 | 31.99 | 3.45  |
| 9  | 31.98 | 31.87 | 3.33  |
| 10 | 39.30 | 40.35 | 5.44  |
| 11 | 44.46 | 44.90 | 5.68  |
| 12 | 42.55 | 40.12 | 4.78  |
| 13 | 33.53 | 21.67 | 16.30 |
| 14 | 34.08 | 19.87 | 22.22 |
| 15 | 33.09 | 22.68 | 18.69 |
| 16 | 41.79 | 30.31 | 36.46 |
| 17 | 43.41 | 35.79 | 35.98 |
| 18 | 39.67 | 39.86 | 38.29 |

---

### Section 3: Salt Coverage Distribution in Unfractured Model

Salt precipitation in unfactured model primarily occurred within reservoir region (Fig. S2). Taking NaCl brine as an example, more than 97% of salt coverage induced by gas-phase CO<sub>2</sub> displacement accumulated in reservoir region (Fig. S2c), while caprock region primarily served as a migration pathway for nanoscale salt particles (Fig. S2a). More than 99% of salt coverage induced by scCO<sub>2</sub> displacement accumulated in reservoir region (Fig S2d), and the caprock region again functioning mainly as a conduit for particle transport (Fig. S2b). Therefore, in unfactured model, our analysis focuses on salt precipitation dynamics occurring within reservoir region.

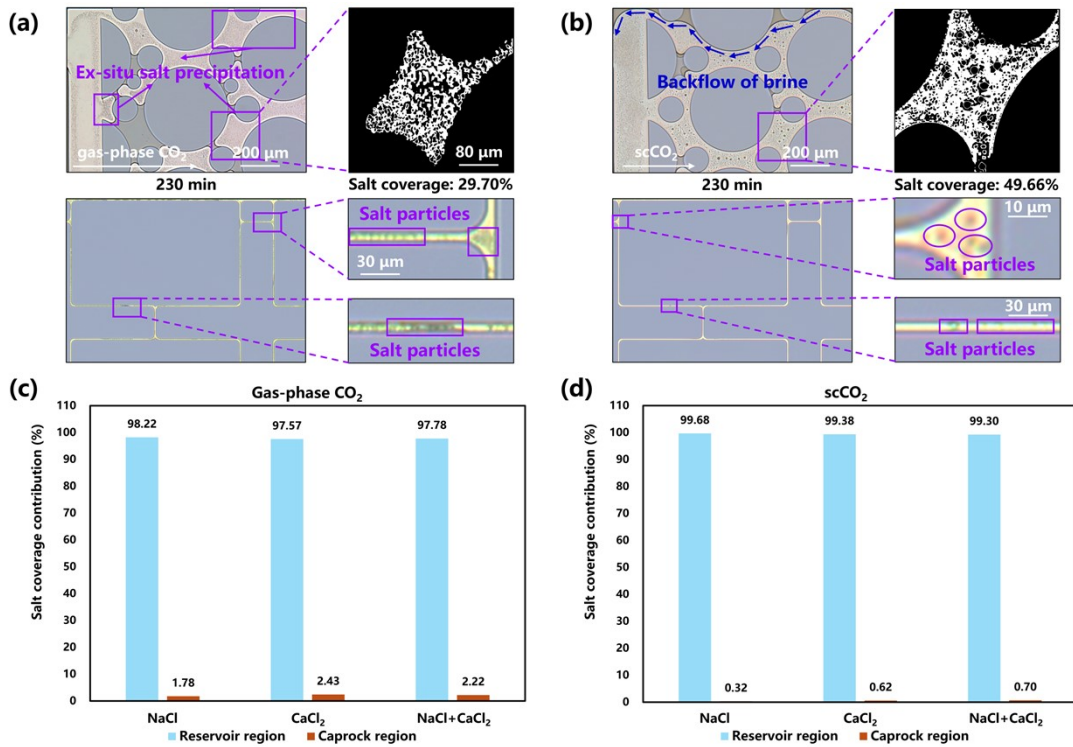

**Fig. S2.** Visualization of salt precipitation in different regions under gas-phase CO<sub>2</sub> (a) and supercritical CO<sub>2</sub> (b) displacement of NaCl brine. Comparison of salt coverage contribution from reservoir and caprock regions for different brine compositions under (c) gas-phase CO<sub>2</sub> and (d) supercritical CO<sub>2</sub> conditions.

## Section 4: Salt Migration Traces at the Outlet in Unfractured and Discrete Fracture Model

The unfractured model experiments demonstrated that both  $\text{CO}_2$  phase and brine composition significantly influence salt precipitation (Fig. S3). Compared with gas-phase  $\text{CO}_2$ ,  $\text{scCO}_2$  resulted in higher salt coverage due to its higher viscosity and brine evaporation flux.

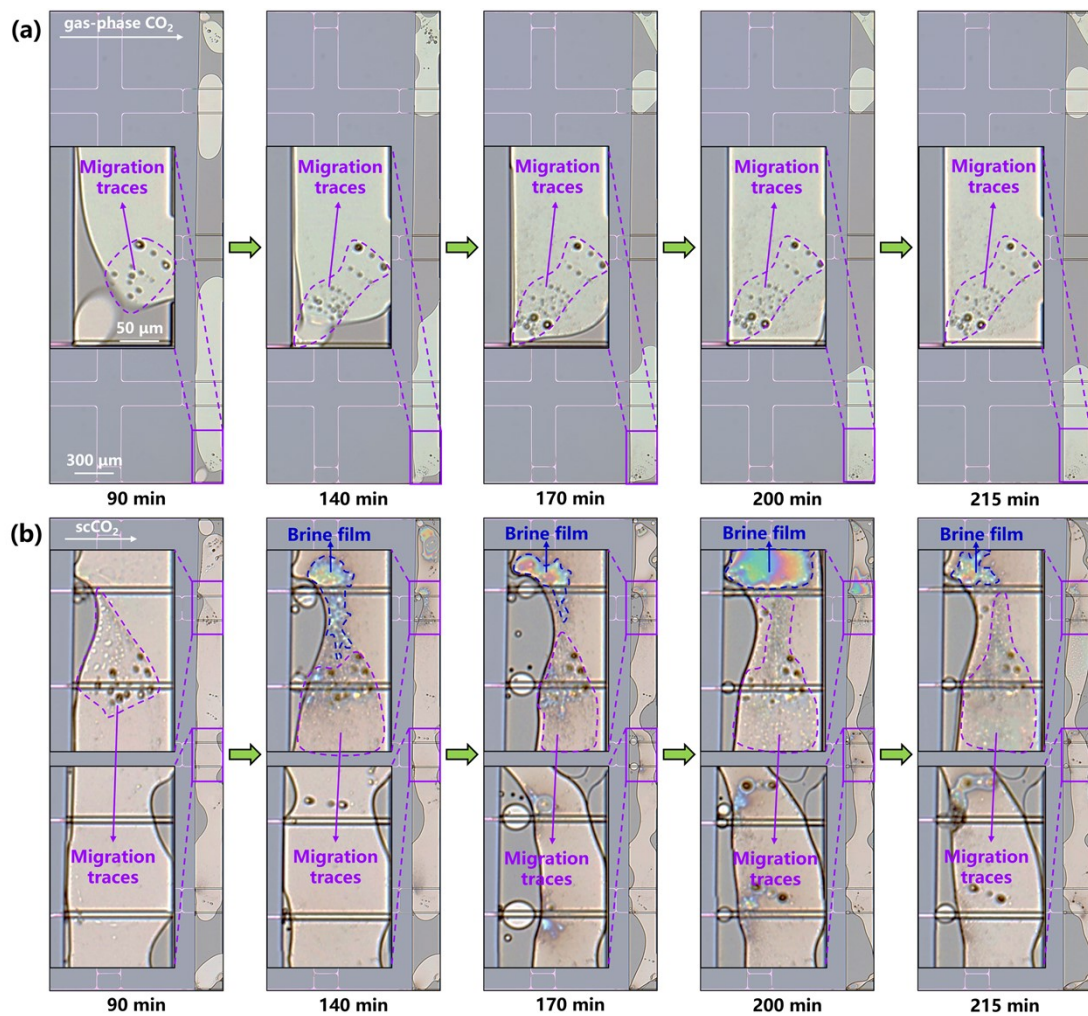

**Fig. S3.** Visualization of salt particle migration traces in different regions of unfractured model under different phases  $\text{CO}_2$  displacement using NaCl brine. (a) gas-phase  $\text{CO}_2$ . (c)  $\text{scCO}_2$ .

The discrete fracture model shows significantly higher salt coverage, as fractures provide more space for accumulation. In fractures, salt precipitation is driven by salt aggregation and migration. Taking NaCl brine as an example, salt aggregates formed under gas-phase CO<sub>2</sub> displacement exhibited loose structures and were prone to salt particle migration (Fig. S4). In contrast, under supercritical CO<sub>2</sub> displacement, the salt aggregates formed were structurally compact and more stable, exhibiting limited particle mobility (Fig S5).

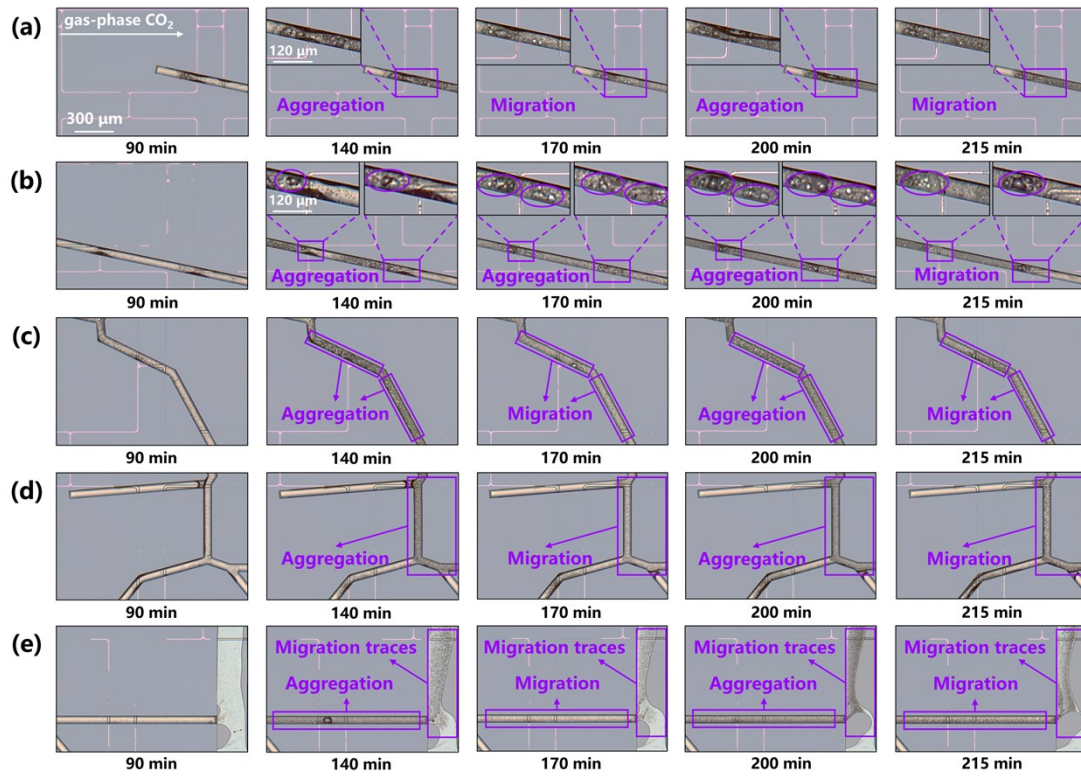

**Fig. S4.** Visualization of salt particle migration in different regions of discrete fracture model under gas-phase CO<sub>2</sub> displacement using NaCl brine. (a) Region 11, (b) Region 12, (c) Region 27, (d) Region 41, (e) Region 42.

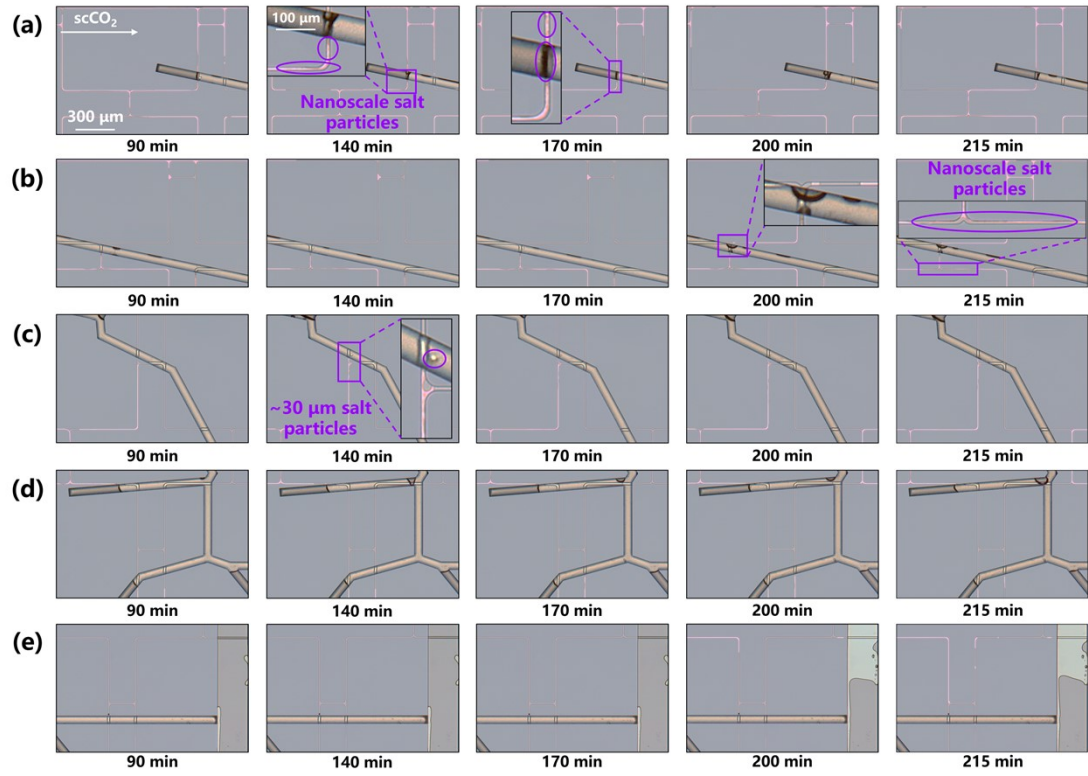

**Fig. S5.** Visualization of salt distribution in discrete fracture model under supercritical CO<sub>2</sub> displacement using NaCl brine. (a) Region 11, (b) Region 12, (c) Region 27, (d) Region 41, (e) Region 42.



## Section 5: Salt Coverage Evolution in Discrete Fracture Model

In discrete fracture model, the aggregation and migration of salt particles within fracture region significantly influenced overall salt coverage, resulting in noticeable fluctuations in temporal coverage curves (Fig. S6).

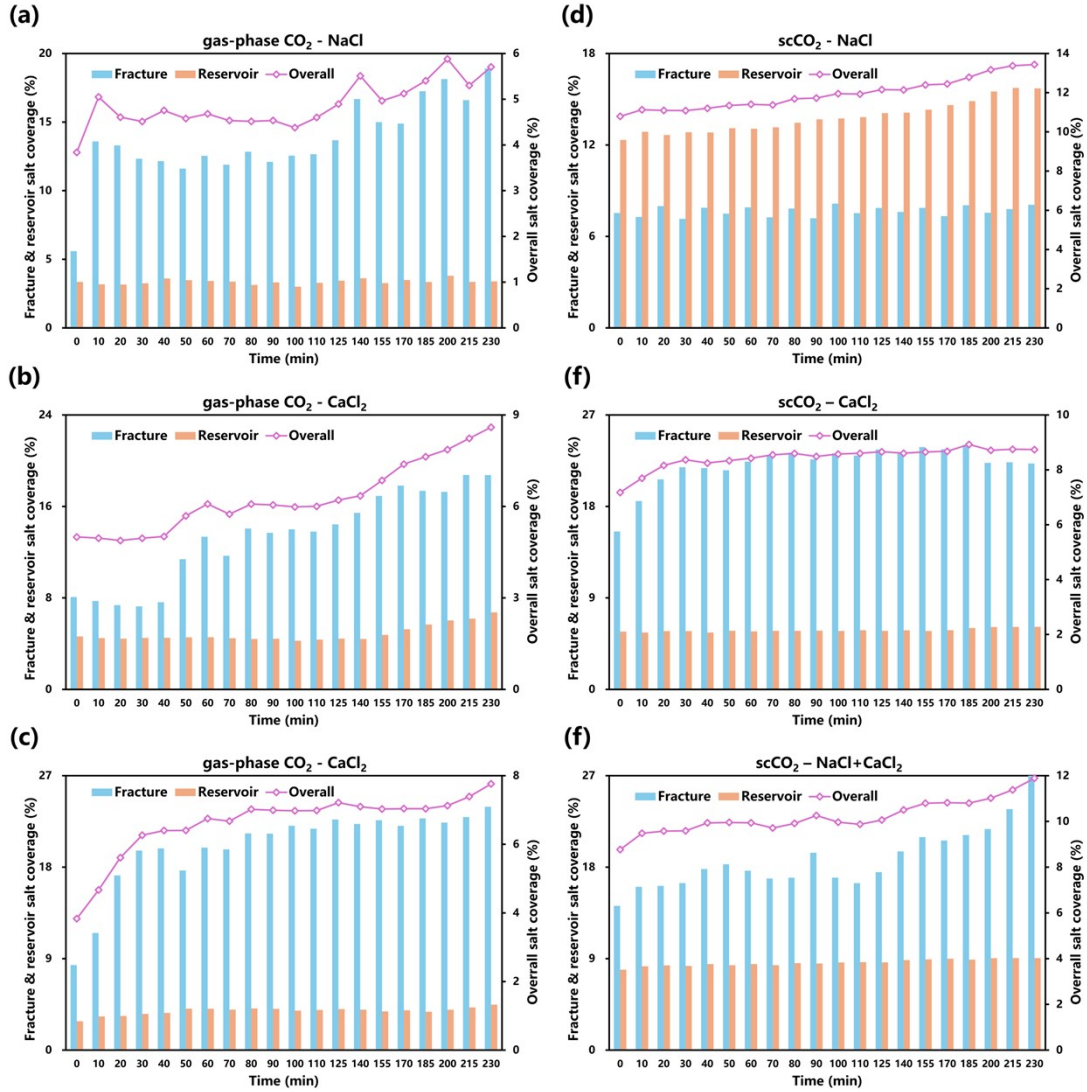

**Fig. S6.** Comparative analysis of salt coverage evolution in reservoir region, fracture region, and entire domain in discrete fracture model. (a-c) Gas-phase CO<sub>2</sub> injection under different brine compositions, (d-f) Supercritical CO<sub>2</sub> injection under different brine compositions.

## **Section 6: Brine Film Formation within Fractures in Interconnected Fracture Model**

Salt precipitation at the reservoir-fracture joint in interconnected fracture model progresses through three stages during gas-phase CO<sub>2</sub> injection (Fig. S7).

**Stage I:** Gas-phase CO<sub>2</sub> rapidly displaces brine from reservoir and breaks through fracture network. Owing to low viscosity and high mobility, CO<sub>2</sub> bypasses residual brine and forms discrete, locally distributed brine films along the hydrophilic fracture walls. These capillary-stabilized films serve as initial sites for salt precipitation.

**Stage II:** Continued CO<sub>2</sub> injection leads to evaporation of brine films, increasing local salinity and triggering salt precipitation. High fracture connectivity enables migration of micron-sized salt particles (~10 μm) with CO<sub>2</sub> flow, while nanoscale particles adhere to fracture surfaces. The patchy brine film distribution results in uneven salt coverage and sporadic particle transport.

**Stage III:** Ongoing evaporation further elevates salinity within residual brine films, creating a concentration gradient that drives brine inflow from adjacent reservoir regions. Replenished brine spreads and evaporates along the channel walls, sustaining salt precipitation both within fracture and near reservoir joint. The intermittent film distribution leads to fragmented salt accumulation and partial particle migration.

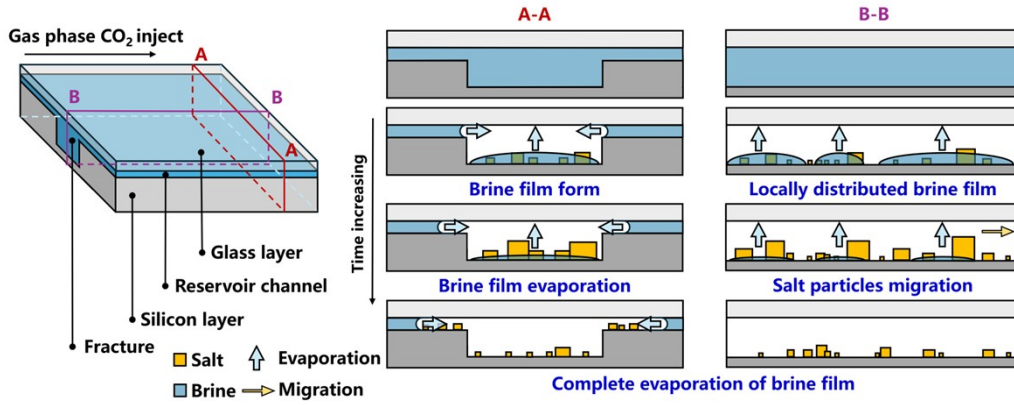

**Fig. S7.** Schematic illustration of brine film formation, evaporation, salt precipitation, and reaccumulation within microfluidic chip under gas-phase CO<sub>2</sub> displacement.

During supercritical CO<sub>2</sub> (scCO<sub>2</sub>) injection, salt precipitation at the reservoir–fracture interface evolves through three stages (Fig S8). Compared to gas-phase CO<sub>2</sub>, the higher viscosity of scCO<sub>2</sub> significantly alters brine film formation and distribution.

**Stage I:** The slower propagation of scCO<sub>2</sub> through reservoir and into fracture facilitates the formation of a continuous brine film along hydrophilic fracture walls. Unlike discontinuous films observed with gas-phase CO<sub>2</sub>, this film is spatially stable and uniformly coats fracture surfaces.

**Stage II:** Continued injection leads to gradual evaporation of brine film and initiates salt precipitation. Micron-sized salt crystals—CaCl<sub>2</sub> (~30 μm) and NaCl (~10 μm)—may begin to migrate, but most remain immobilized. This immobilization results from protective brine film surrounding the particles, which suppresses large-scale transport. Only uncoated or partially exposed particles migrate, slowing the net increase in salt coverage.



**Stage III:** Persistent evaporation near injection point raises local salinity within fracture, creating a gradient that drives brine inflow from adjacent reservoir. The unsaturated brine reaccumulates as a film near injection front and spreads along fracture walls under interfacial tension. This brine film reaccumulation mechanism sustains localized salt precipitation and limits particle migration, resulting in more stable and spatially confined salt coverage.

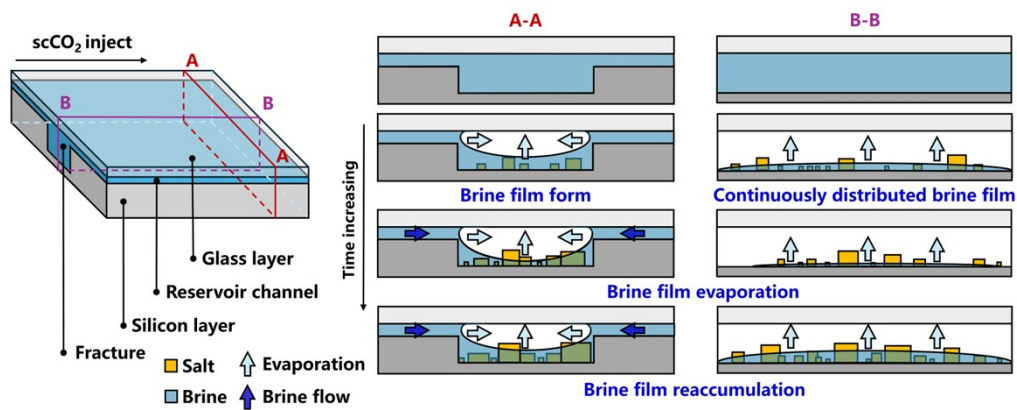

**Fig. S8.** Schematic illustration of brine film formation, evaporation, salt precipitation, and reaccumulation within microfluidic chip under  $scCO_2$  displacement.

## References

1. E. Stavropoulou and L. Laloui, *Sci Rep*, 2022, **12**, 10706.
2. B. Brigaud, B. Vincent, C. Durlet, J. F. Deconinck, P. Blanc and A. Trouiller, *Journal of Sedimentary Research*, 2010, **80**, 791-807.
3. O. Bildstein, C. Kervévan, V. Lagneau, P. Delaplace, A. Crédoz, P. Audigane, E. Perfetti, N. Jacquemet and M. Jullien, *Oil & Gas Science and Technology – Revue de l’Institut Français du Pétrole*, 2010, **65**, 485-502.
4. S. Peng, H. Shan, Y. Li, Z. Yang and Z. Zhong, *Procedia Earth and Planetary Science*, 2013, **7**, 669-672.
5. J. Jing, Y. Yang, J. Cheng, X. Jing and Z. Ding, *Energy & Fuels*, 2024, **38**, 11891-11908.

6. C. Zou, D. Dong, S. Wang, J. Li, X. Li, Y. Wang, D. Li and K. Cheng, *Petroleum Exploration and Development*, 2010, **37**, 641-653.
7. K. Larssen, K. Senger and S.-A. Grundvåg, *Marine and Petroleum Geology*, 2020, **122**.
8. S. Bando, F. Takemura, M. Nishio, E. Hihara and M. Akai, *J. Chem. Eng. Data*, 2003, **48**, 576-579.
9. L. Liu, W. Zhu, C. Wei, D. Elsworth and J. Wang, *Journal of Petroleum Science and Engineering*, 2018, **164**, 91-102.
10. N. Spycher and K. Pruess, *Geochimica et Cosmochimica Acta*, 2005, **69**, 3309-3320.
